# Supplementary material for: Structural features and catalytic performance in CO preferential oxidation of CuO–CeO2 supported on multi-walled carbon nanotubes
Source: Royal Society of Chemistry journal article supplement (doi:10.1039/c4cy01220h), 2014-12-01
Supplement: c4cy01220h1.pdf [file c4cy01220h1.pdf]

## **Structural features and catalytic performance in CO preferential oxidation of CuO-CeO<sub>2</sub> supported on multi-walled carbon nanotubes**

Yuxian Gao,<sup>a</sup> Kangmin Xie,<sup>a</sup> Wendong Wang,<sup>\*a</sup> Shiyang Mi,<sup>a</sup> Ning Liu,<sup>a</sup> Guoqiang Pan<sup>b</sup> and Weixin Huang<sup>a</sup>

<sup>a</sup> *CAS Key Laboratory of Materials for Energy Conversion and Department of Chemical Physics, University of Science and Technology of China, Hefei 230026, China.*

<sup>b</sup> *National Synchrotron Radiation Laboratory, University of Science and Technology of China, Hefei 230029, China.*

---

\* Corresponding author. Tel.: +86-551-63603683; fax: +86-551-63606735.  
*E-mail address:* wangwd@ustc.edu.cn

**Table S1** Structure characteristics for CuO-CeO<sub>2</sub> catalysts supported on different materials

| Catalyst                                                  | Cu/Ce <sup>a</sup> | Cu/Ce <sup>b</sup> | Cu/Ce <sup>c</sup> | <i>d</i> <sub>CeO<sub>2</sub></sub> (nm) | Ce <sup>3+</sup> /Ce <sub>total</sub> |
|-----------------------------------------------------------|--------------------|--------------------|--------------------|------------------------------------------|---------------------------------------|
| CuO-CeO <sub>2</sub> (5/5)/AC                             | 1.00               | 1.03               | 2.62               | 3.1                                      | 0.29                                  |
| CuO-CeO <sub>2</sub> (5/5)/Al <sub>2</sub> O <sub>3</sub> | 1.00               | 0.97               | 0.91               | 3.5                                      | 0.40                                  |
| CuO-CeO <sub>2</sub> (5/5)/SiO <sub>2</sub>               | 1.00               | 0.95               | 0.86               | 4.1                                      | 0.24                                  |

<sup>a</sup> Cu/Ce ratio according to the nominal composition.

<sup>b</sup> Cu/Ce ratio determined by ICP-AES.

<sup>c</sup> Cu/Ce ratio determined by XPS.

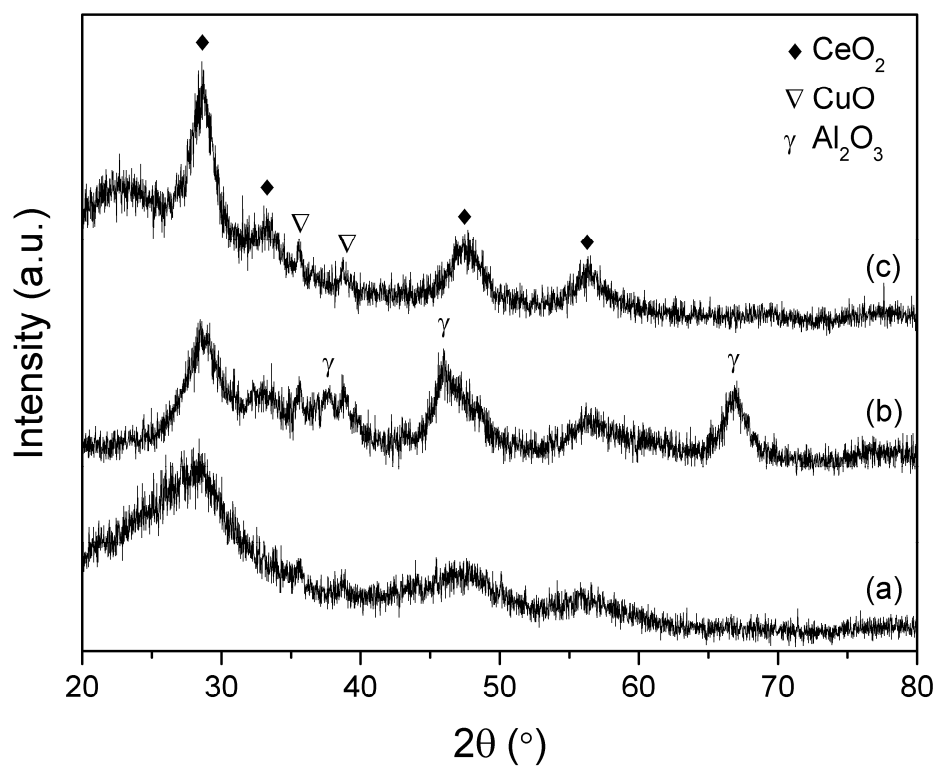

**Fig. S1.** XRD patterns of  $\text{CuO-CeO}_2$  catalysts supported on different materials: (a)  $\text{CuO-CeO}_2(5/5)/\text{AC}$ , (b)  $\text{CuO-CeO}_2(5/5)/\text{Al}_2\text{O}_3$ , (c)  $\text{CuO-CeO}_2(5/5)/\text{SiO}_2$ .

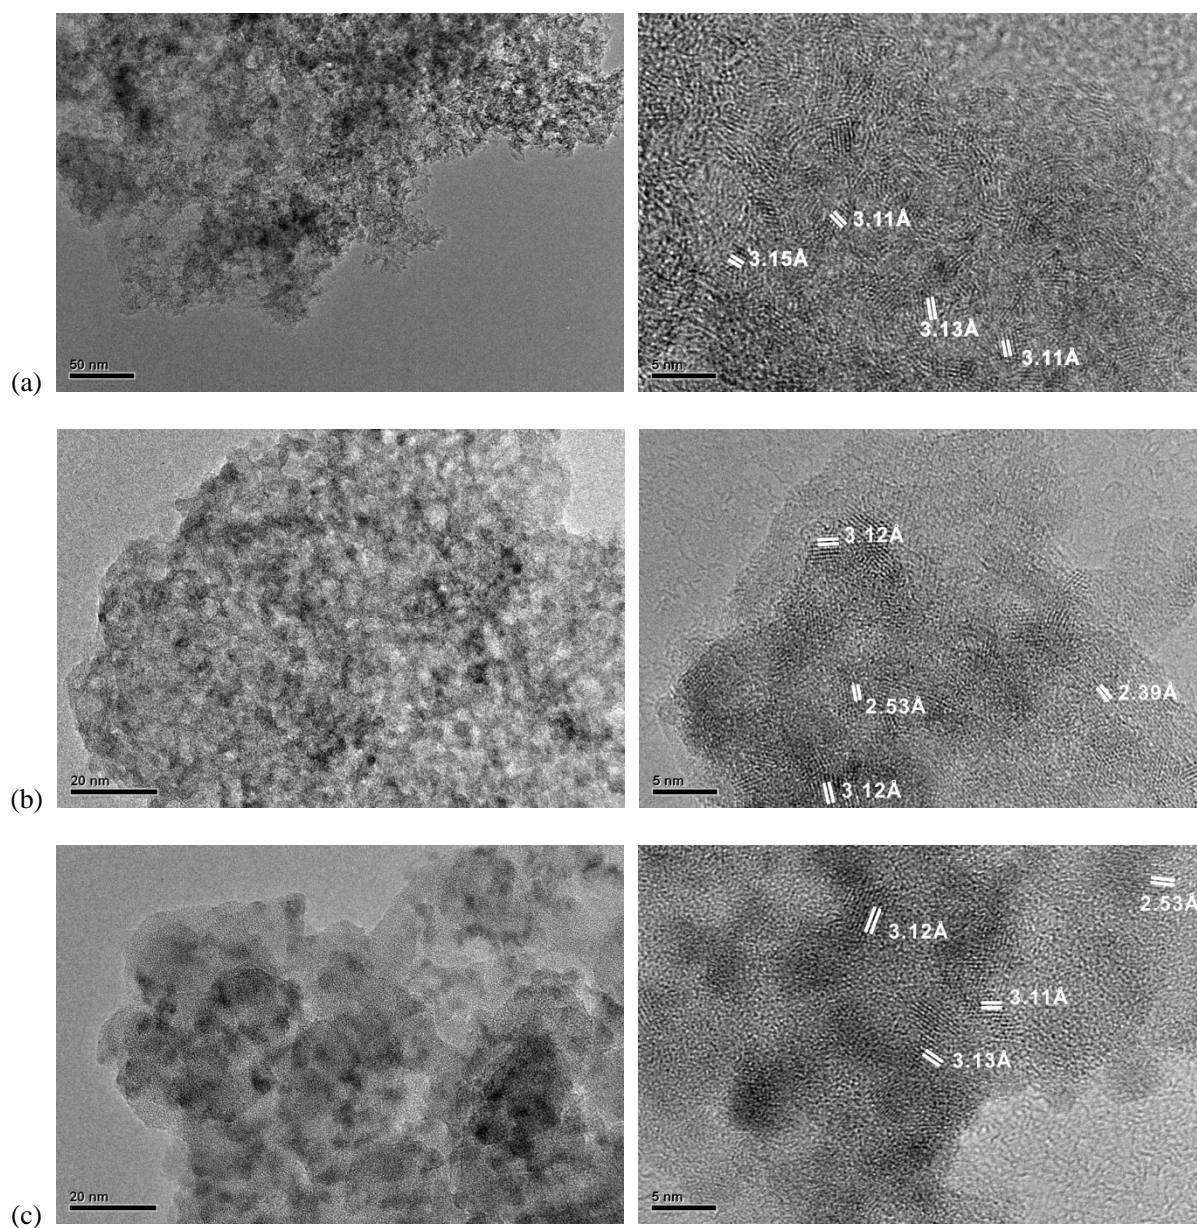

**Fig. S2.** TEM (left) and HRTEM (right) images of CuO-CeO<sub>2</sub> catalysts supported on different materials: (a) CuO-CeO<sub>2</sub>(5/5)/AC, (b) CuO-CeO<sub>2</sub>(5/5)/Al<sub>2</sub>O<sub>3</sub>, (c) CuO-CeO<sub>2</sub>(5/5)/SiO<sub>2</sub>.

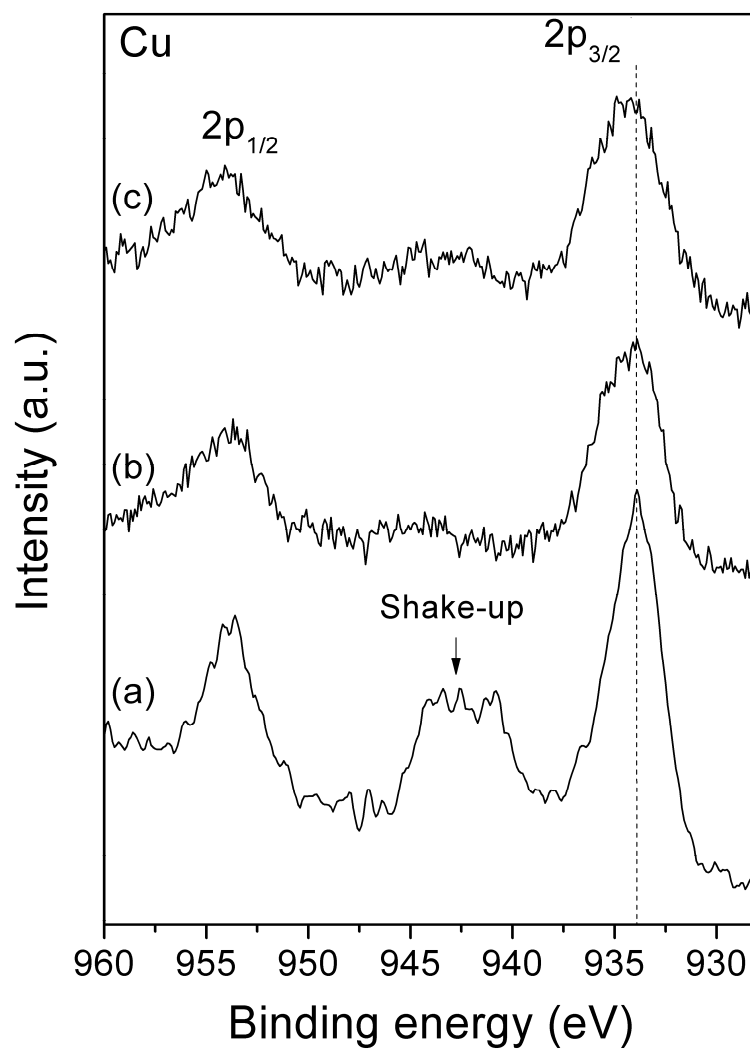

**Fig. S3.** Cu 2p core level spectra of CuO-CeO<sub>2</sub> catalysts supported on different materials: (a) CuO-CeO<sub>2</sub>(5/5)/AC, (b) CuO-CeO<sub>2</sub>(5/5)/SiO<sub>2</sub>, (c) CuO-CeO<sub>2</sub>(5/5)/Al<sub>2</sub>O<sub>3</sub>.

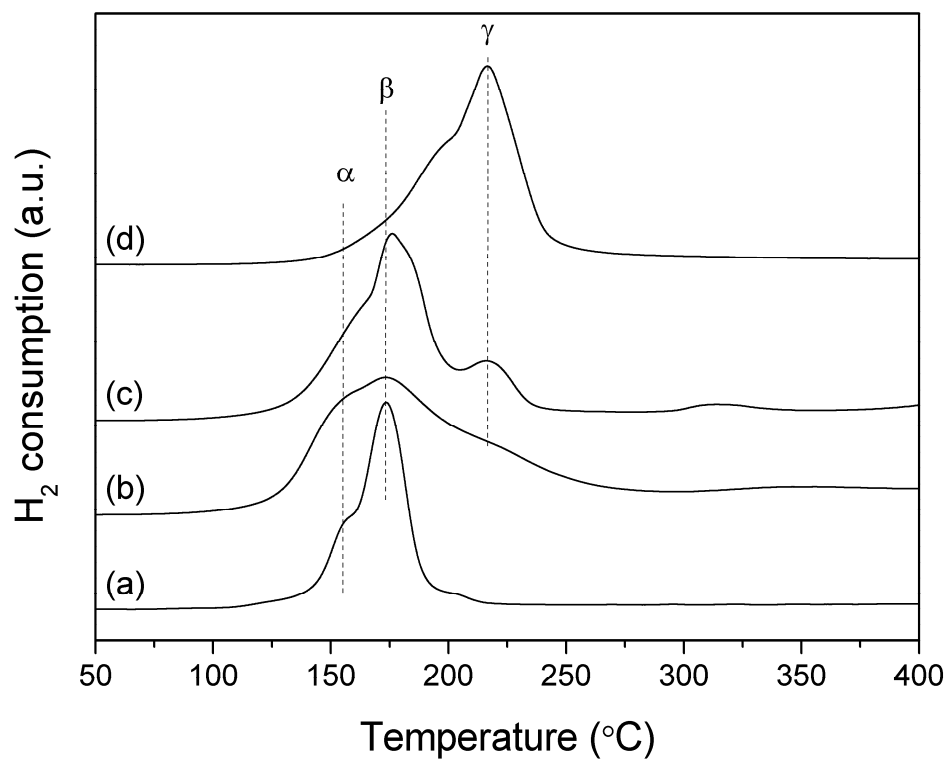

**Fig. S4.** H<sub>2</sub>-TPR profiles of CuO-CeO<sub>2</sub> catalysts supported on different materials: (a) CuO-CeO<sub>2</sub>(5/5)/CNT, (b) CuO-CeO<sub>2</sub>(5/5)/AC, (c) CuO-CeO<sub>2</sub>(5/5)/SiO<sub>2</sub> and (d) CuO-CeO<sub>2</sub>(5/5)/Al<sub>2</sub>O<sub>3</sub>.
